# Supplementary material for: Development of a Highly Selective and Sensitive Fluorescent Probe for Imaging RNA Dynamics in Live Cells
Source: MDPI journal article supplement (doi:10.3390/molecules27206927), 2022-10-15
Supplement: s1 [file s1]

## Supplementary Materials

### Development of a Highly Selective and Sensitive Fluorescent Probe for Imaging RNA Dynamics in Live Cells

Lan Fang<sup>†</sup>, Wen Shao<sup>†</sup>, Shu-Tang Zeng, Gui-Xue Tang, Jia-Tong Yan, Shuo-Bin Chen, Zhi-Shu Huang,  
Jia-Heng Tan and Xiu-Cai Chen\*

Guangdong Provincial Key Laboratory of New Drug Design and Evaluation, School of Pharmaceutical  
Sciences, Sun Yat-sen University, Guangzhou, 510006, China

\* E-mail address: chenxc35@mail.sysu.edu.cn (Xiu-Cai Chen).

<sup>†</sup>These authors contributed equally to this work.

#### Table of Contents:

|                                                                                                       |     |
|-------------------------------------------------------------------------------------------------------|-----|
| <b>Figure S1.</b> Selectivity of <b>QUID-1</b> or SYTO RNASelect toward RNA versus DNA                | S3  |
| <b>Figure S2.</b> Linear fit equations for calculating LOD values of <b>QUID-1</b> and SYTO RNASelect | S4  |
| <b>Figure S3.</b> Normalized UV and fluorescence emission spectrum of <b>QUID-1-QUID-6</b>            | S4  |
| <b>Figure S4.</b> Linear fit equations for calculating LOD values of probes ( <b>QUID-2-QUID-6</b> )  | S5  |
| <b>Figure S5.</b> The UV spectra of <b>QUID-2</b> with or without RNA                                 | S5  |
| <b>Figure S6.</b> Concentration-Dependent UV-Vis absorbance of <b>QUID-2</b>                          | S6  |
| <b>Figure S7.</b> The spectra of <b>QUID-2</b> in glycerol-water mixed solution                       | S6  |
| <b>Figure S8.</b> Co-staining <b>QUID-2</b> with BFP-G3BP1                                            | S7  |
| <b>Figure S9.</b> <sup>1</sup> H NMR spectrum of intermediate <b>4</b>                                | S7  |
| <b>Figure S10.</b> <sup>1</sup> H NMR spectrum of intermediate <b>5</b>                               | S8  |
| <b>Figure S11.</b> <sup>1</sup> H NMR spectrum of intermediate <b>6</b>                               | S8  |
| <b>Figure S12.</b> <sup>1</sup> H NMR spectrum of intermediate <b>7</b>                               | S9  |
| <b>Figure S13.</b> <sup>1</sup> H NMR spectrum of intermediate <b>8</b>                               | S9  |
| <b>Figure S14.</b> <sup>1</sup> H NMR spectrum of <b>QUID-2</b>                                       | S10 |
| <b>Figure S15.</b> <sup>13</sup> C NMR spectrum of <b>QUID-2</b>                                      | S10 |
| <b>Figure S16.</b> HRMS spectrum of <b>QUID-2</b>                                                     | S11 |
| <b>Figure S17.</b> <sup>1</sup> H NMR spectrum of <b>QUID-3</b>                                       | S12 |
| <b>Figure S18.</b> <sup>13</sup> C NMR spectrum of <b>QUID-3</b>                                      | S12 |
| <b>Figure S19.</b> HRMS spectrum of <b>QUID-3</b>                                                     | S13 |

|                                                                  |     |
|------------------------------------------------------------------|-----|
| <b>Figure S20.</b> $^1\text{H}$ NMR spectrum of <b>QUID-4</b>    | S14 |
| <b>Figure S21.</b> $^{13}\text{C}$ NMR spectrum of <b>QUID-4</b> | S14 |
| <b>Figure S22.</b> HRMS spectrum of <b>QUID-4</b>                | S15 |
| <b>Figure S23.</b> $^1\text{H}$ NMR spectrum of <b>QUID-5</b>    | S16 |
| <b>Figure S24.</b> $^{13}\text{C}$ NMR spectrum of <b>QUID-5</b> | S16 |
| <b>Figure S25.</b> HRMS spectrum of <b>QUID-5</b>                | S17 |
| <b>Figure S26.</b> $^1\text{H}$ NMR spectrum of <b>QUID-6</b>    | S18 |
| <b>Figure S27.</b> $^{13}\text{C}$ NMR spectrum of <b>QUID-6</b> | S18 |
| <b>Figure S28.</b> HRMS spectrum of <b>QUID-6</b>                | S19 |

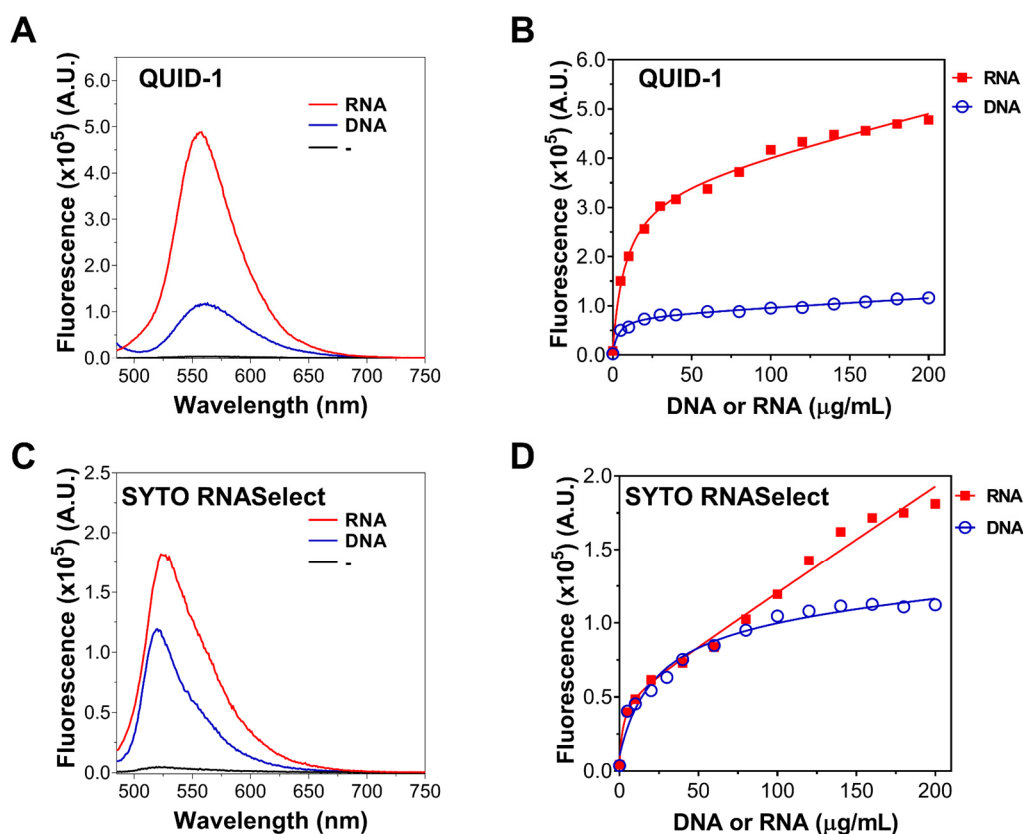

**Figure S1.** Selectivity of **QUID-1** or SYTO RNASelect toward RNA versus DNA. (A) Fluorescence emission spectrum of 1  $\mu\text{M}$  **QUID-1** with or without 200  $\mu\text{g/mL}$  baker's yeast RNA or salmon testes DNA in TE buffer. (B) The fluorescence intensity enhancement of 1  $\mu\text{M}$  **QUID-1** at 560 nm against the sample concentrations,  $\lambda_{\text{ex}} = 470$  nm. (C) Fluorescence emission spectrum of 1  $\mu\text{M}$  SYTO RNASelect with or without 200  $\mu\text{g/mL}$  baker's yeast RNA or salmon testes DNA in TE buffer. (D) The fluorescence intensity enhancement of 1  $\mu\text{M}$  SYTO RNASelect at 525 nm against the sample concentrations,  $\lambda_{\text{ex}} = 470$  nm.

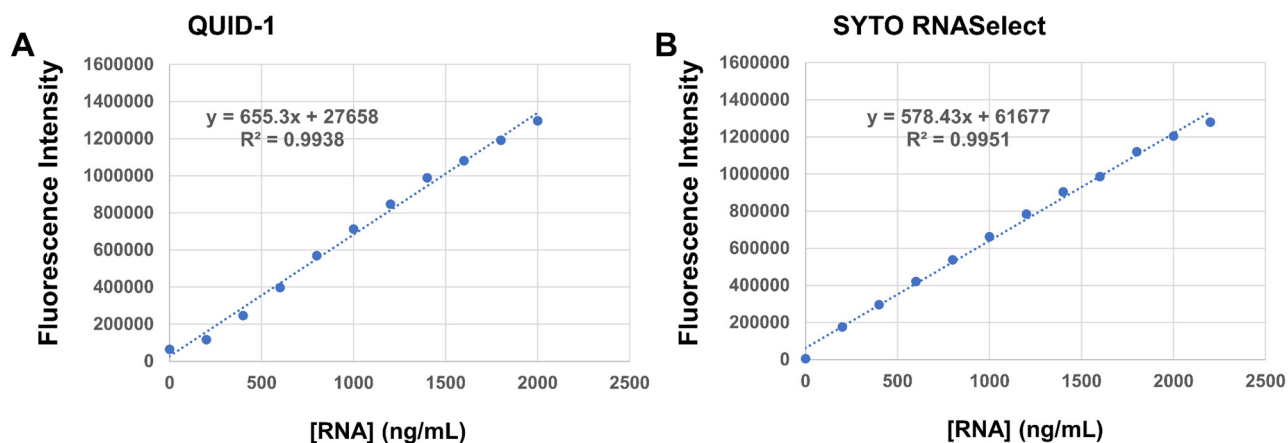

**Figure S2.** (A) Linear fit equations for calculating LOD values of **QUID-1** for baker's yeast RNA. (B) Linear fit equations for calculating LOD values of SYTO RNASelect for baker's yeast RNA.

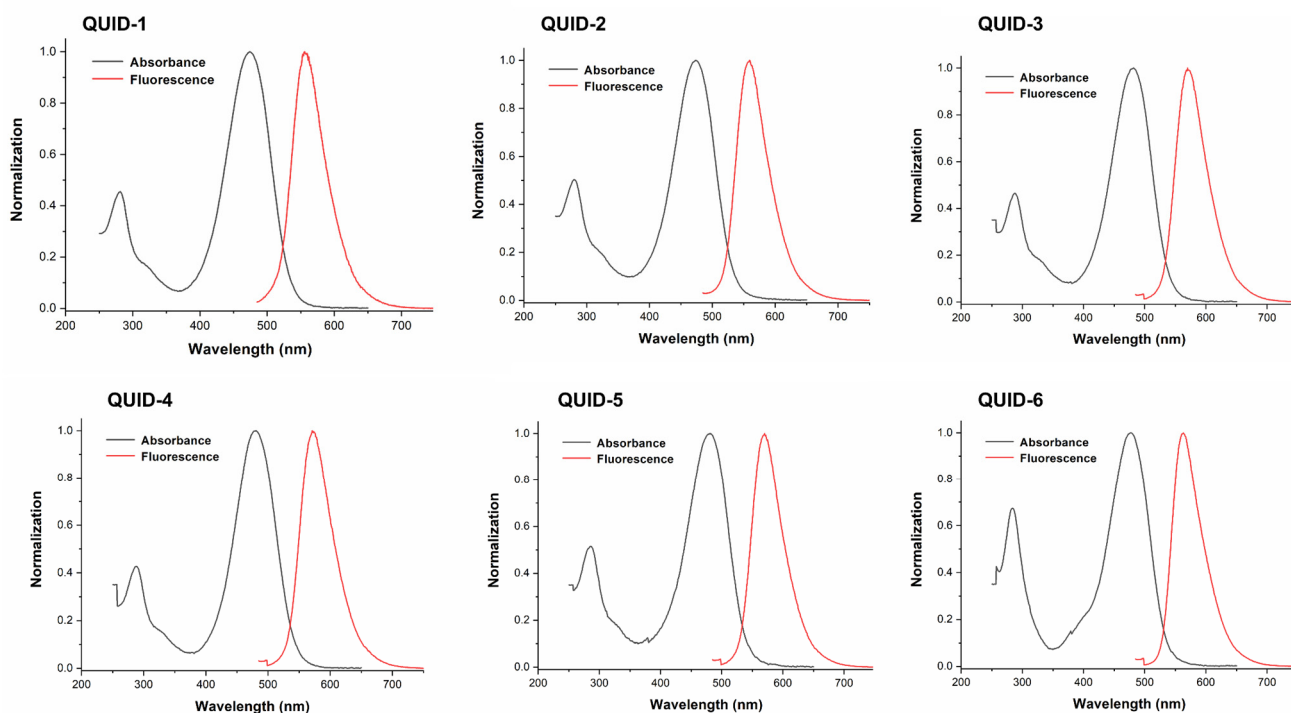

**Figure S3.** Normalized UV spectra of **QUID-1–QUID-6** (5  $\mu$ M) in TE buffer and normalized fluorescence emission spectrum of **QUID-1–QUID-6** (1  $\mu$ M) with 100  $\mu$ g/mL baker's yeast RNA.

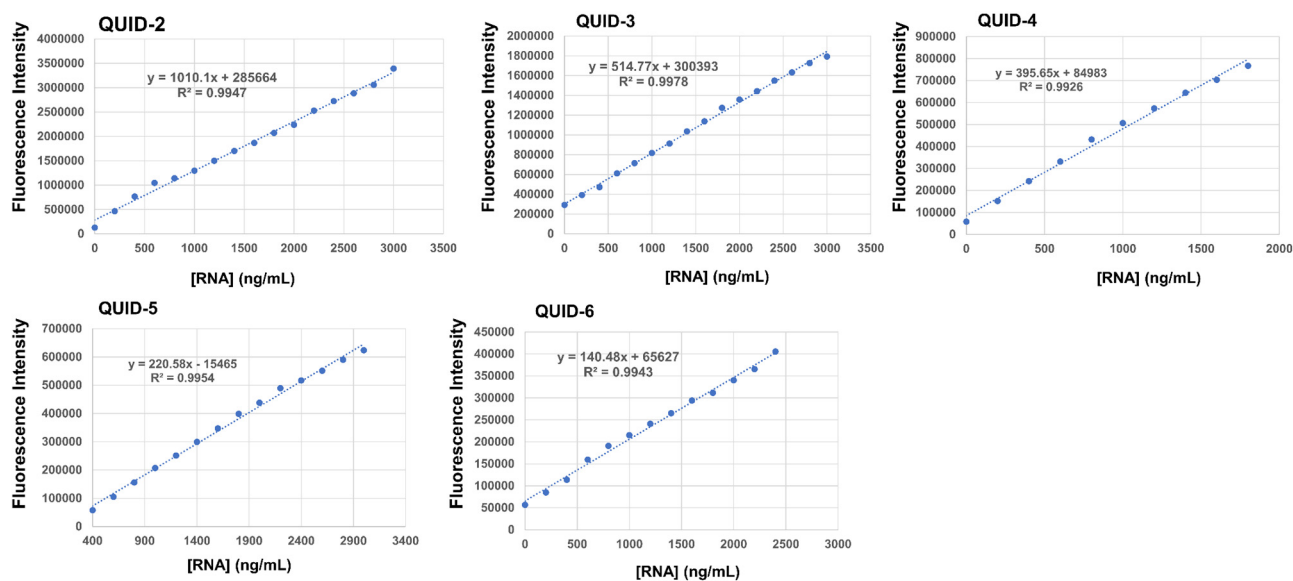

**Figure S4.** Linear fit equations for calculating LOD values of probes (QUID-2–QUID-6) for baker's yeast RNA.

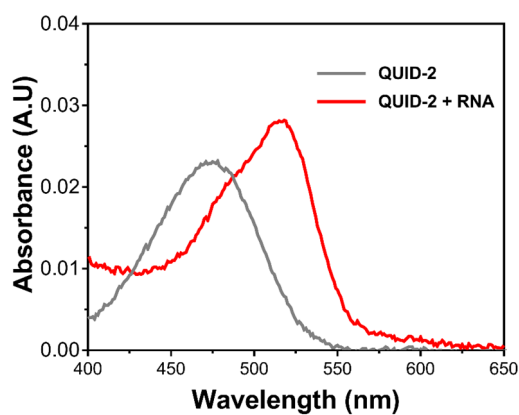

**Figure S5.** The UV spectra of QUID-2 (1  $\mu$ M) with or without 100  $\mu$ g/mL baker's yeast RNA in TE buffer.

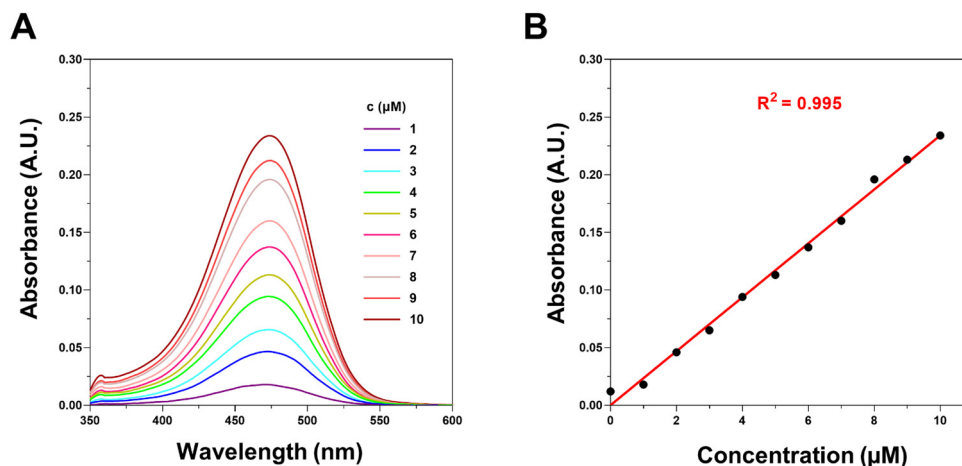

**Figure S6.** Concentration-Dependent UV-Vis absorbance of **QUID-2**. All of the spectra were collected in TE buffer. (A) The spectra of **QUID-2** at different concentrations. (B) The absorbance of **QUID-2** at 475 nm showed that the variations follow the Beer-Lambert law. **QUID-2** had little propensity to aggregate in buffer according to its concentration dependent absorbance spectra.

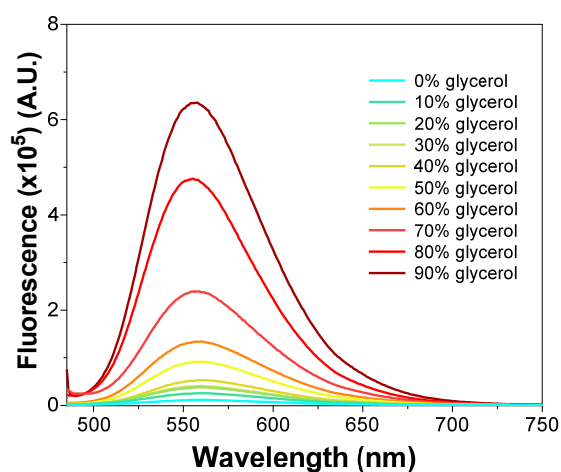

**Figure S7.** The spectra of **QUID-2** (1  $\mu\text{M}$ ) in glycerol-water mixed solution.



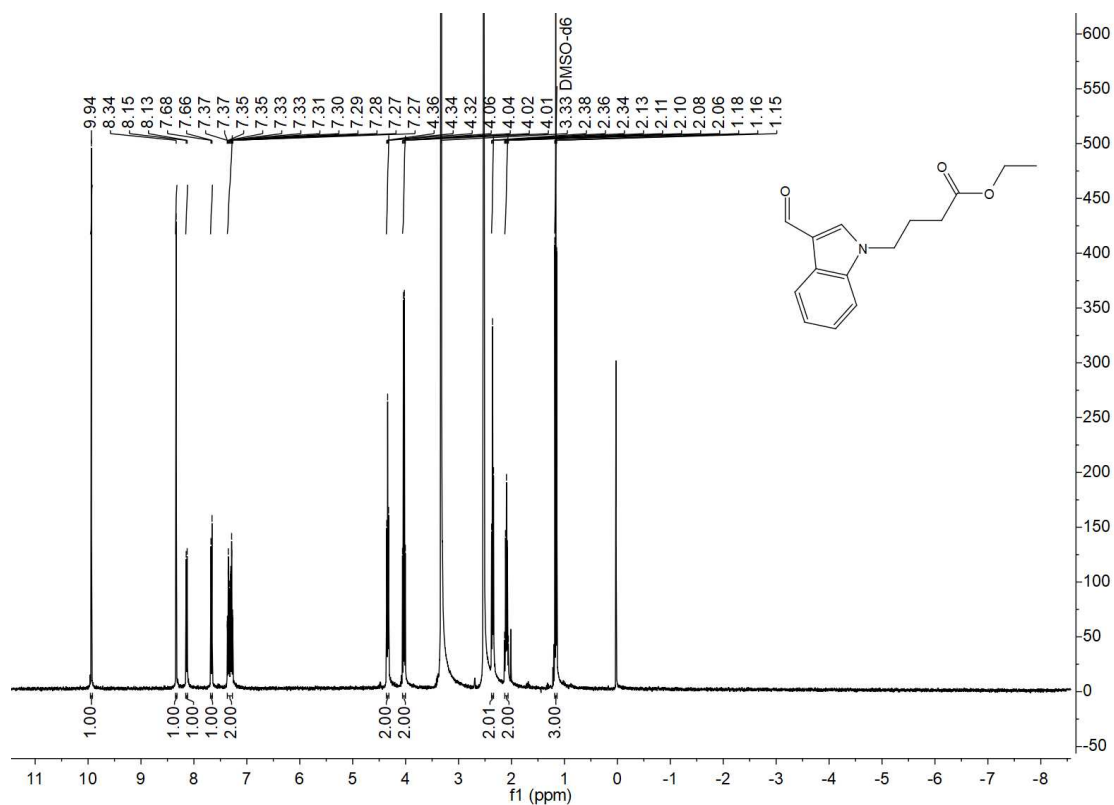

**Figure S10.** <sup>1</sup>H NMR spectrum of intermediate **5**.

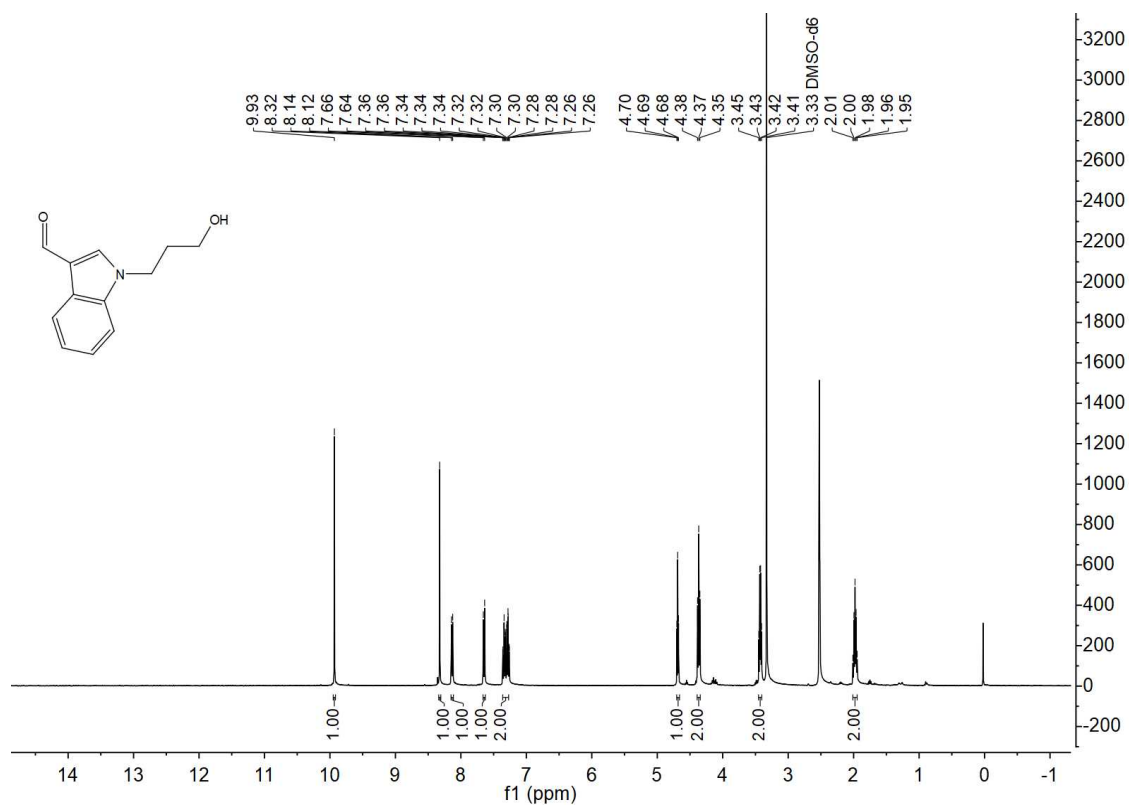

**Figure S11.** <sup>1</sup>H NMR spectrum of intermediate **6**.

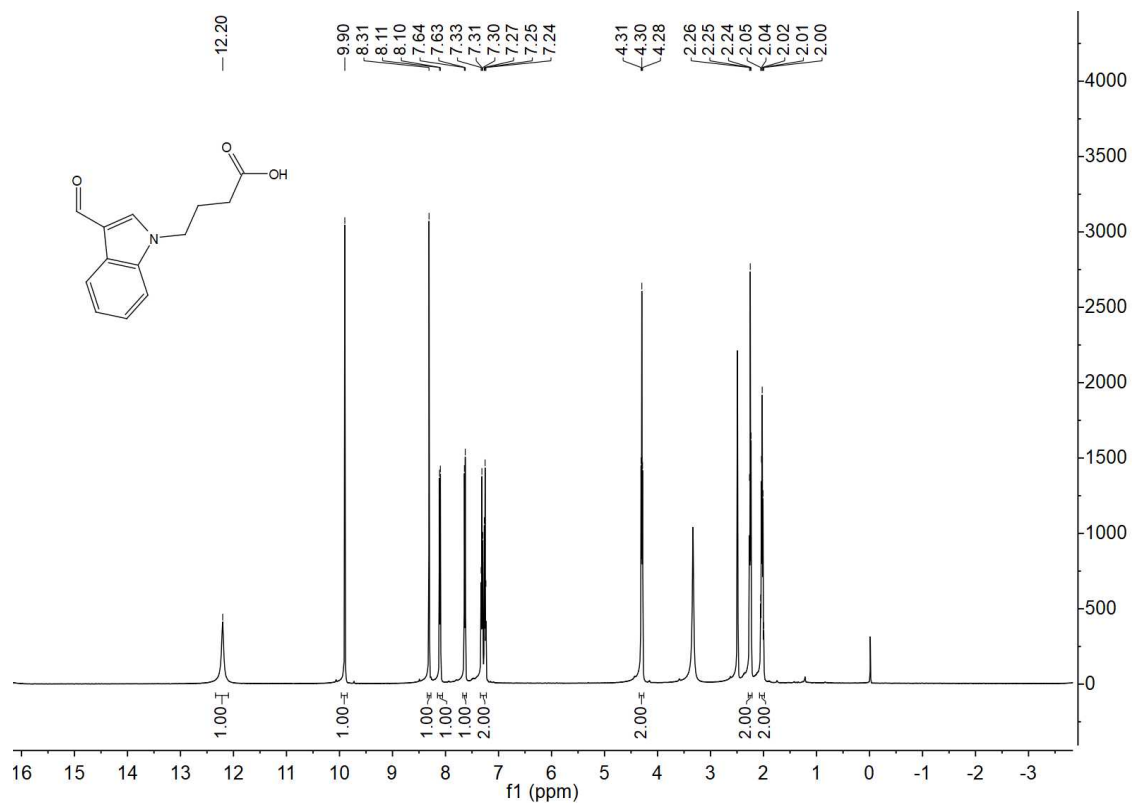

**Figure S12.**  $^1\text{H}$  NMR spectrum of intermediate 7.

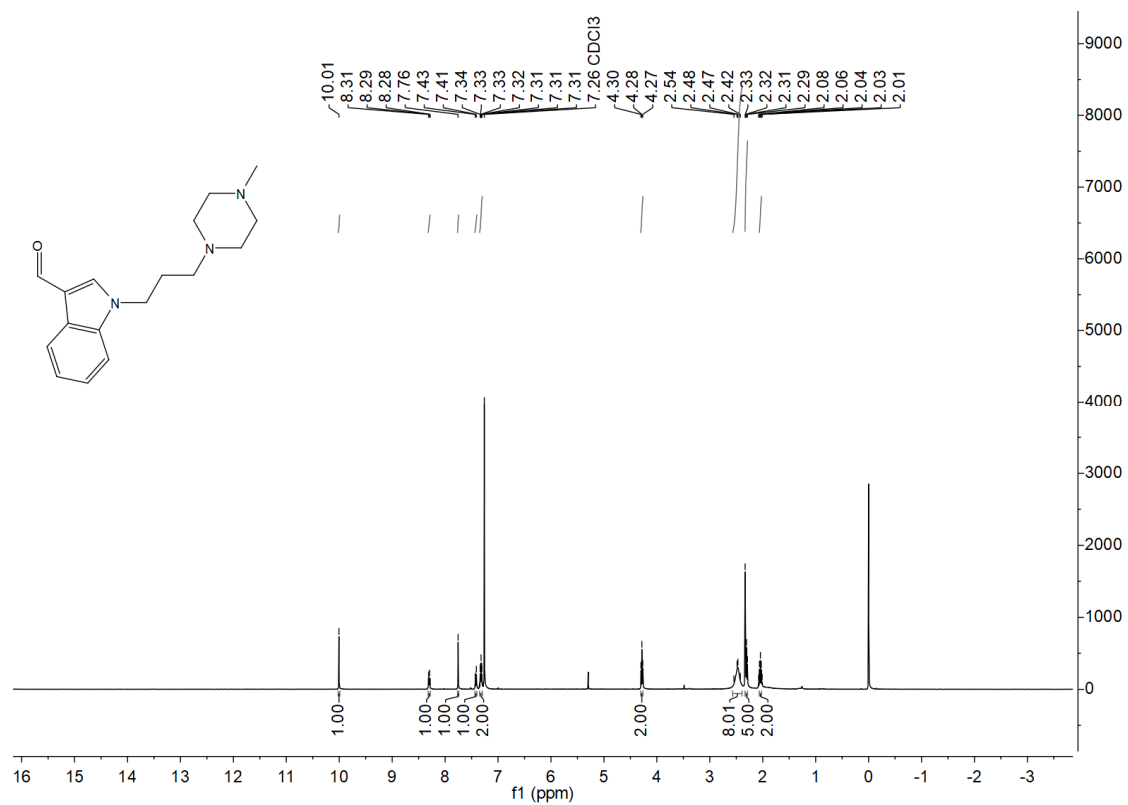

**Figure S13.**  $^1\text{H}$  NMR spectrum of intermediate **8**.

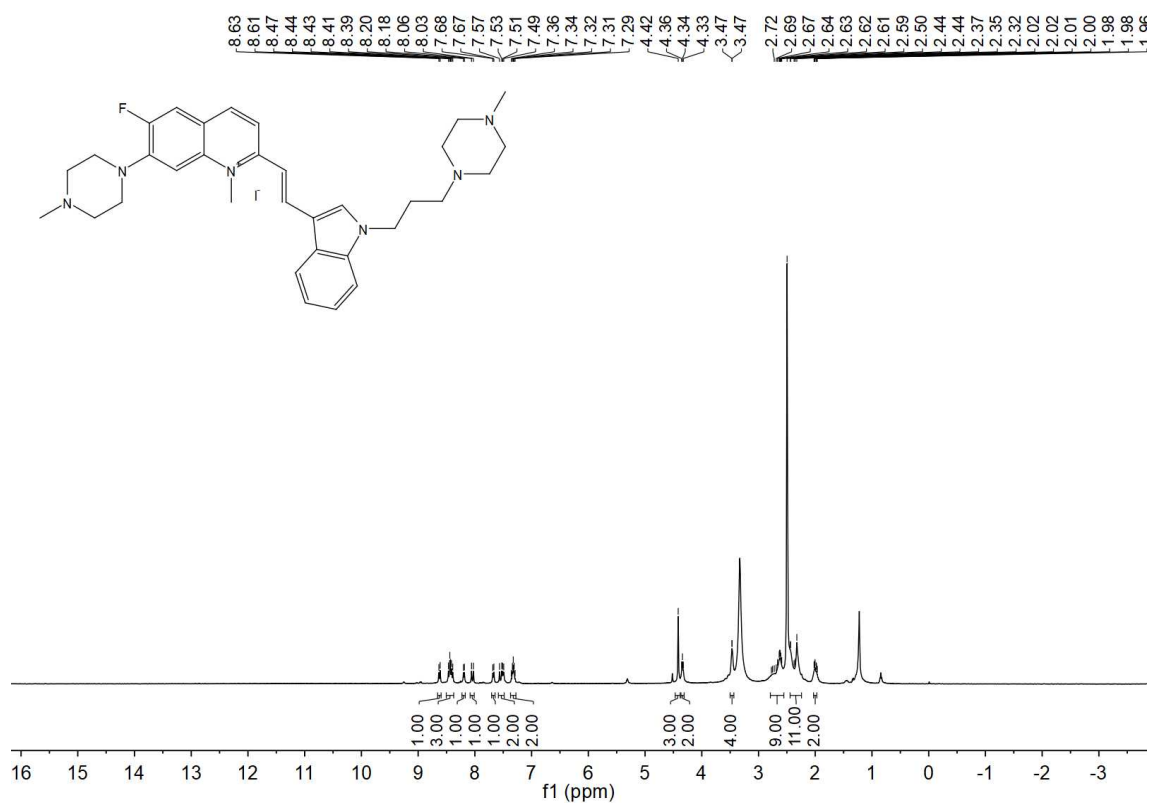

**Figure S14.** <sup>1</sup>H NMR spectrum of QUID-2.

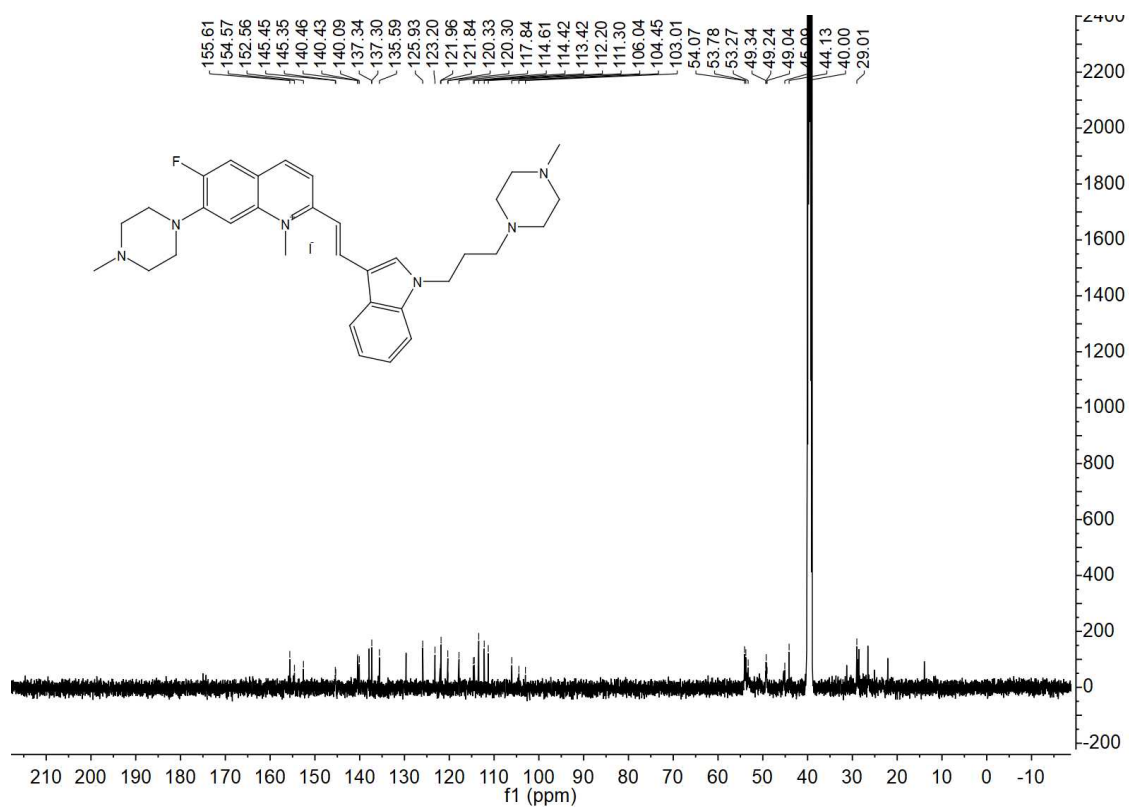

**Figure S15.** <sup>13</sup>C NMR spectrum of QUID-2.

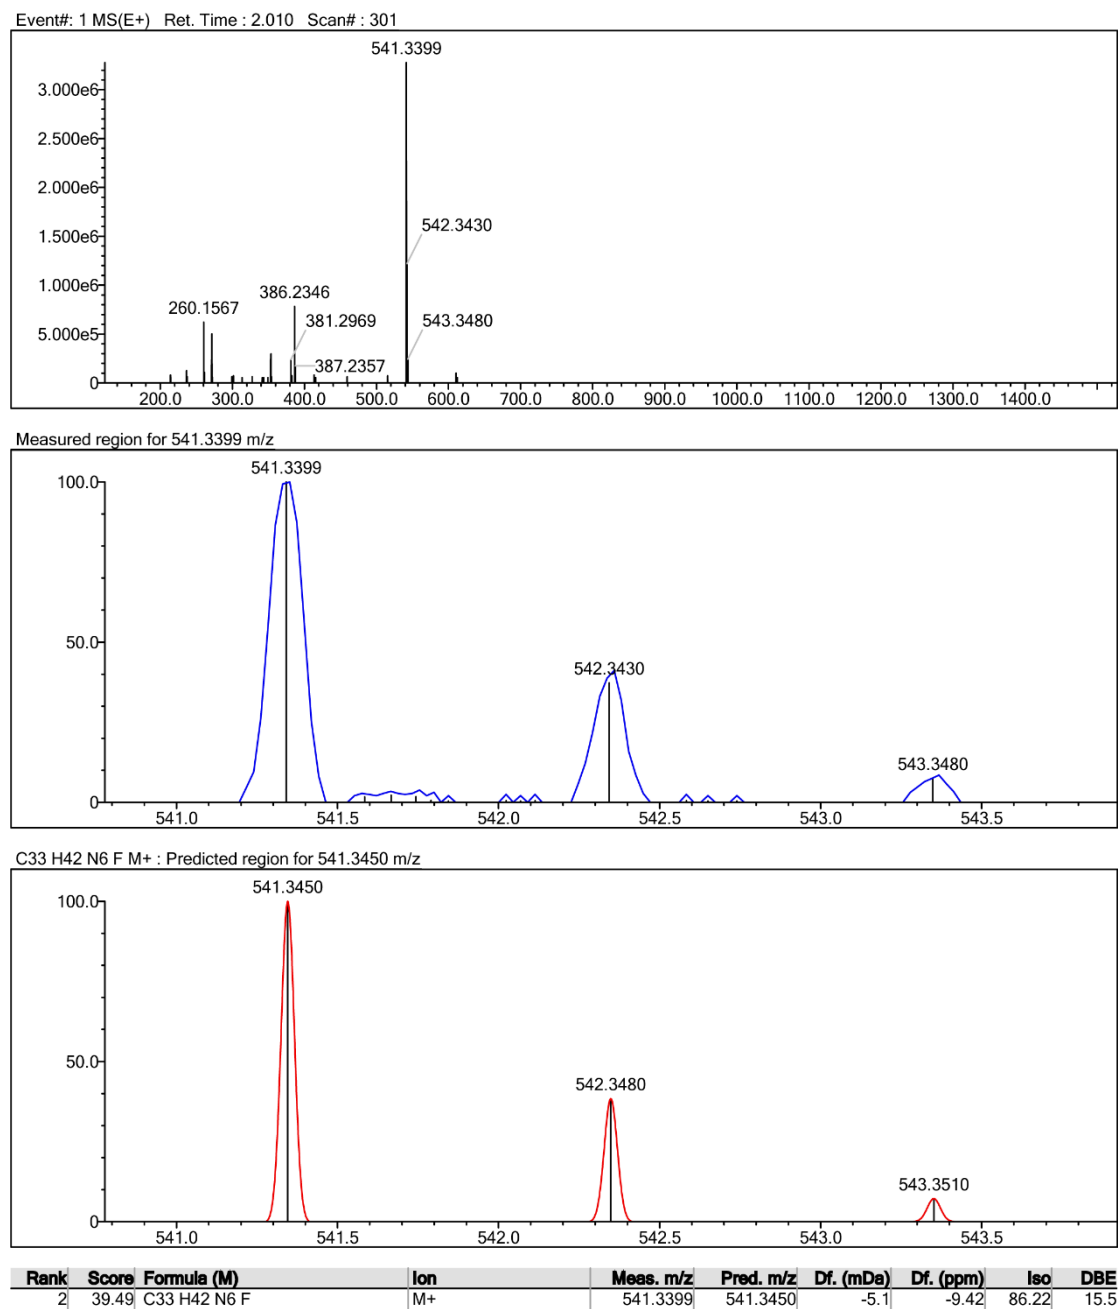

Figure S16. HRMS spectrum of QUID-2.

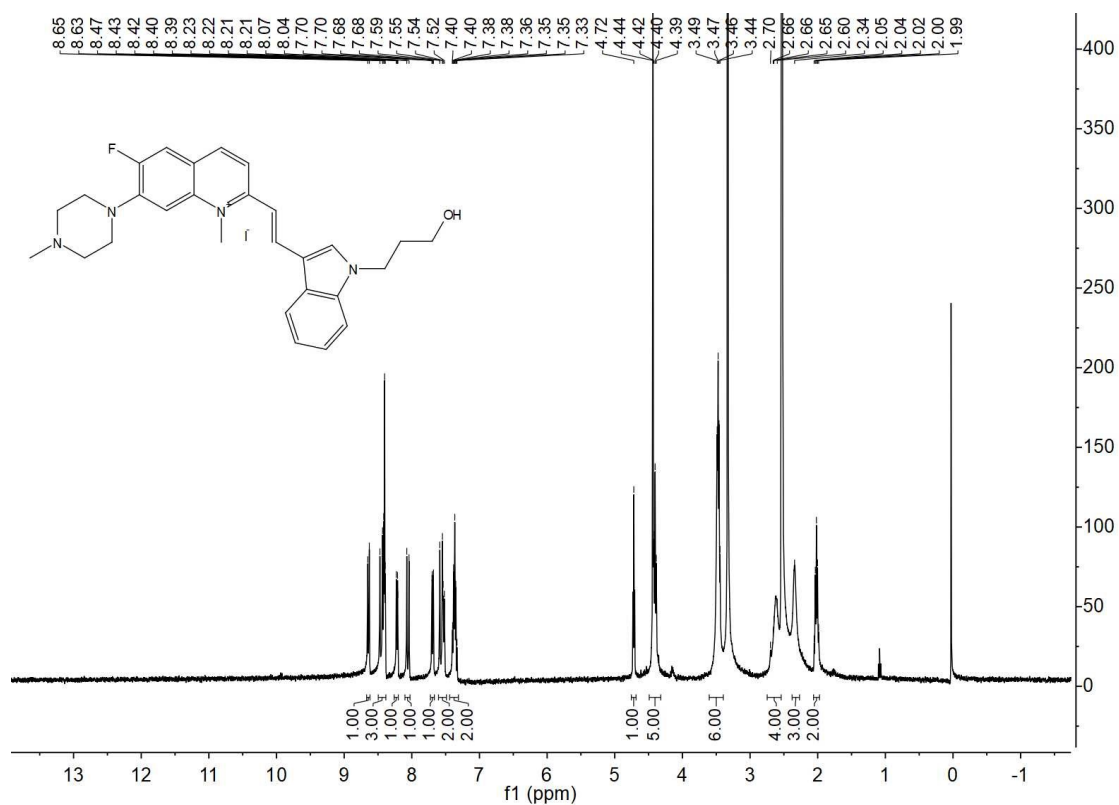

**Figure S17.** <sup>1</sup>H NMR spectrum of QUID-3.

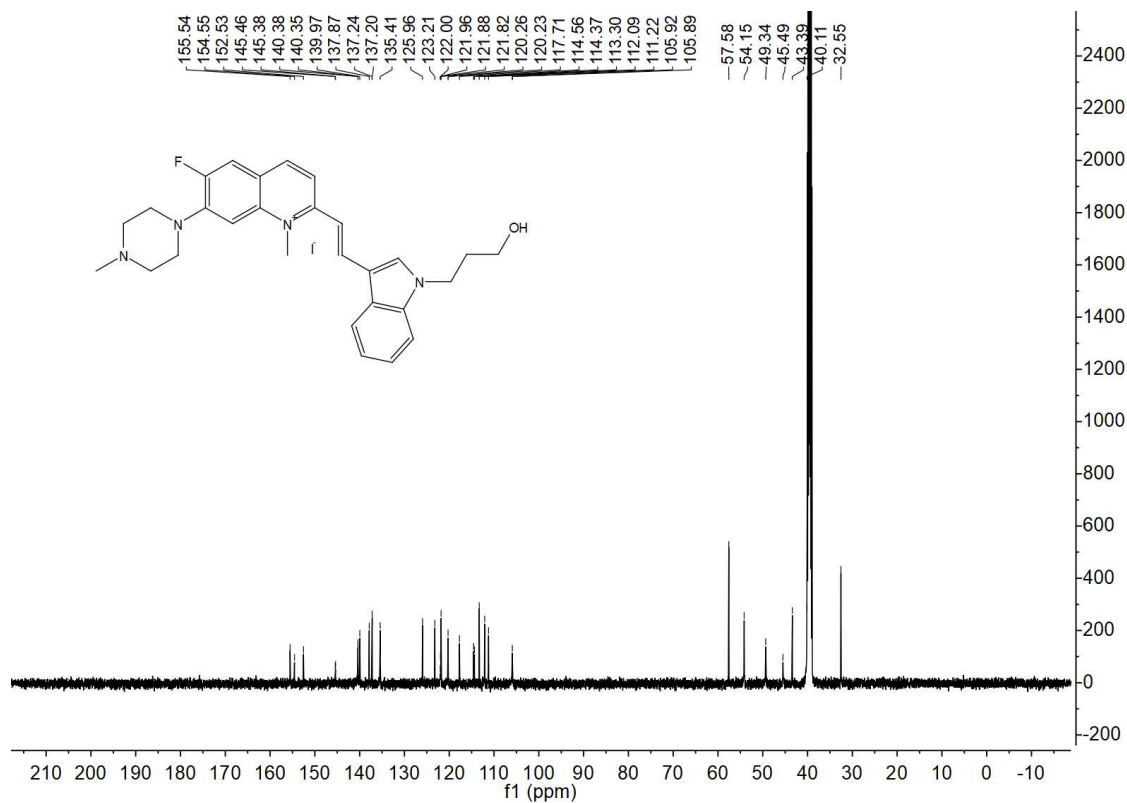

**Figure S18.** <sup>13</sup>C NMR spectrum of QUID-3.

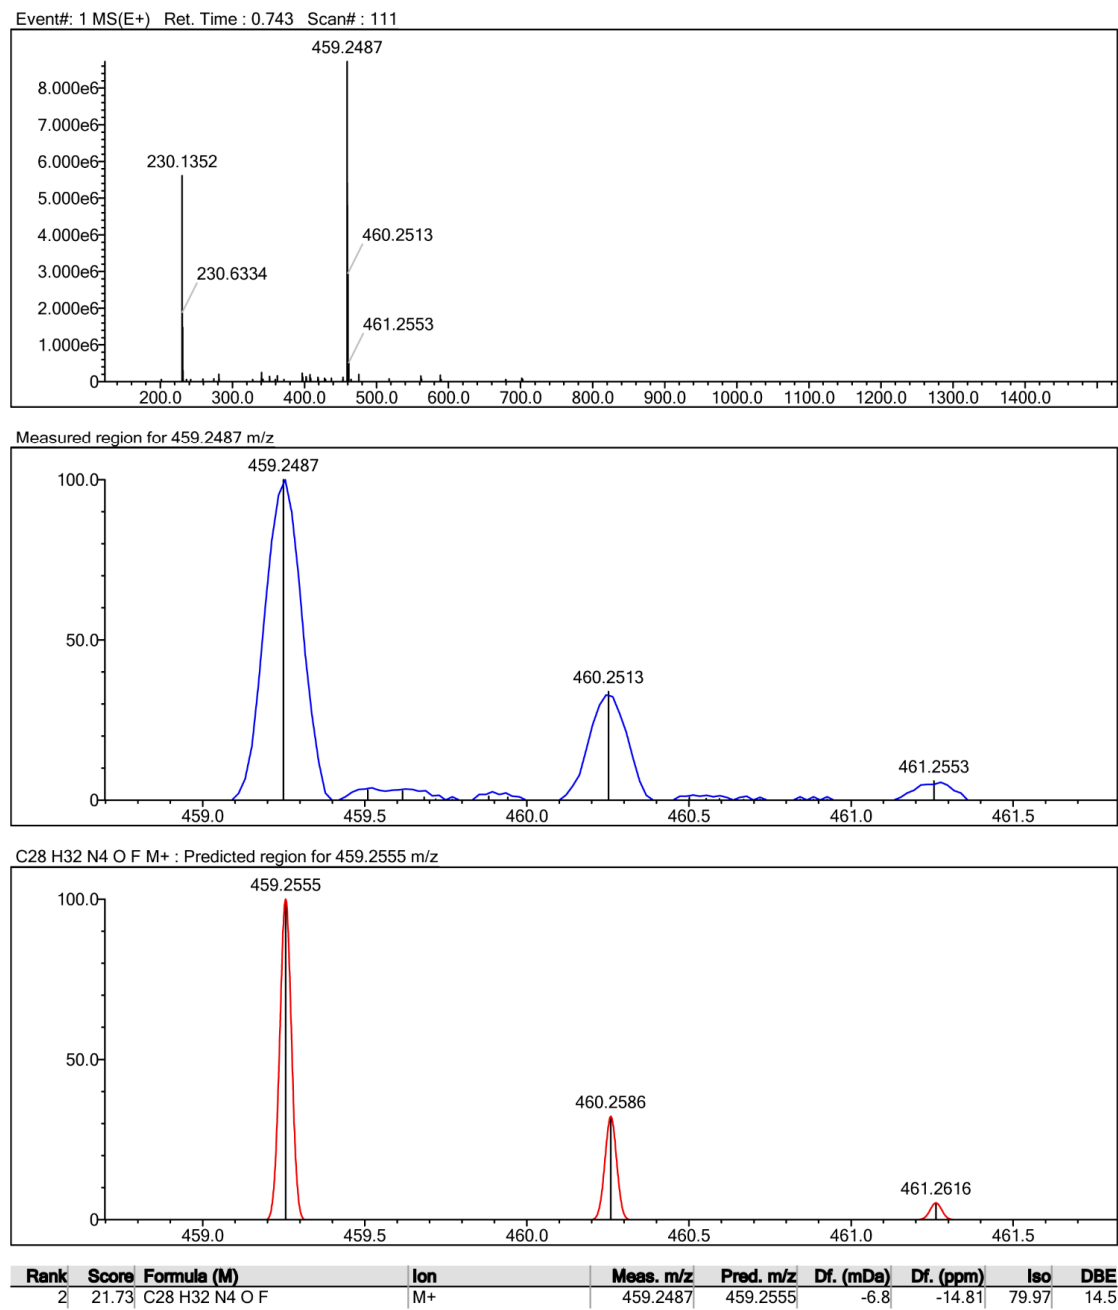

Figure S19. HRMS spectrum of QUID-3.

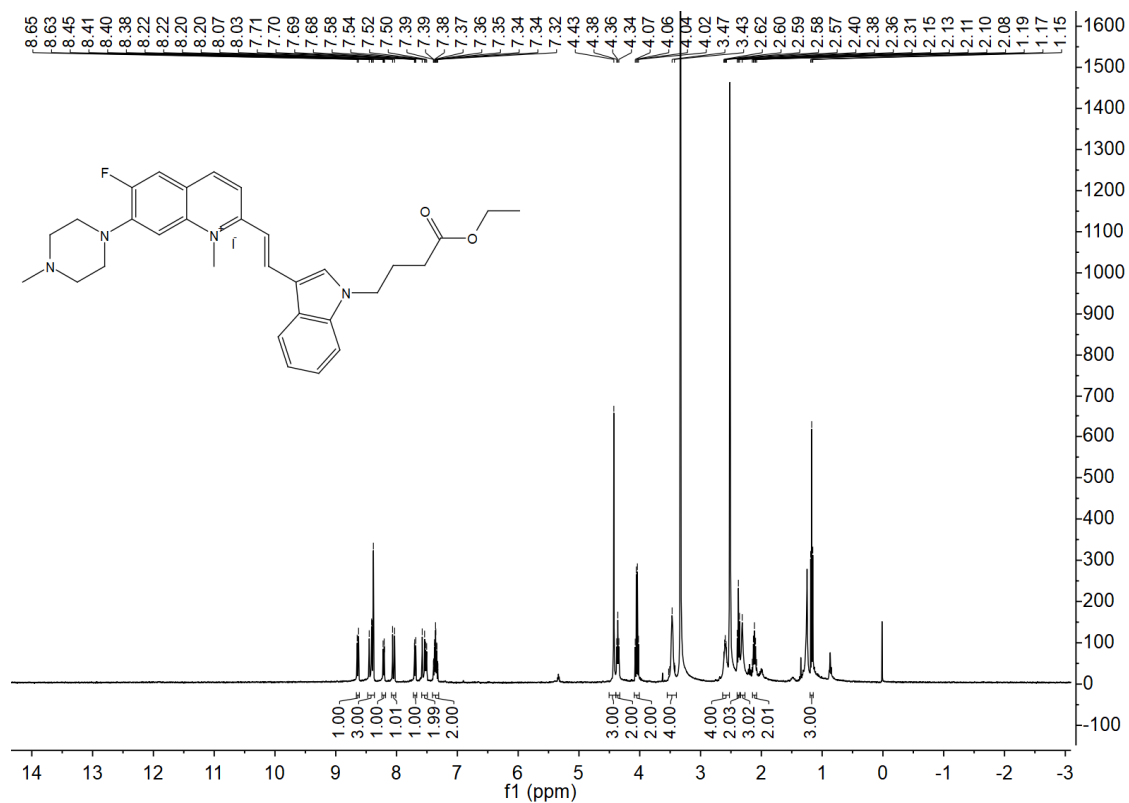

Figure S20. <sup>1</sup>H NMR spectrum of QUID-4.

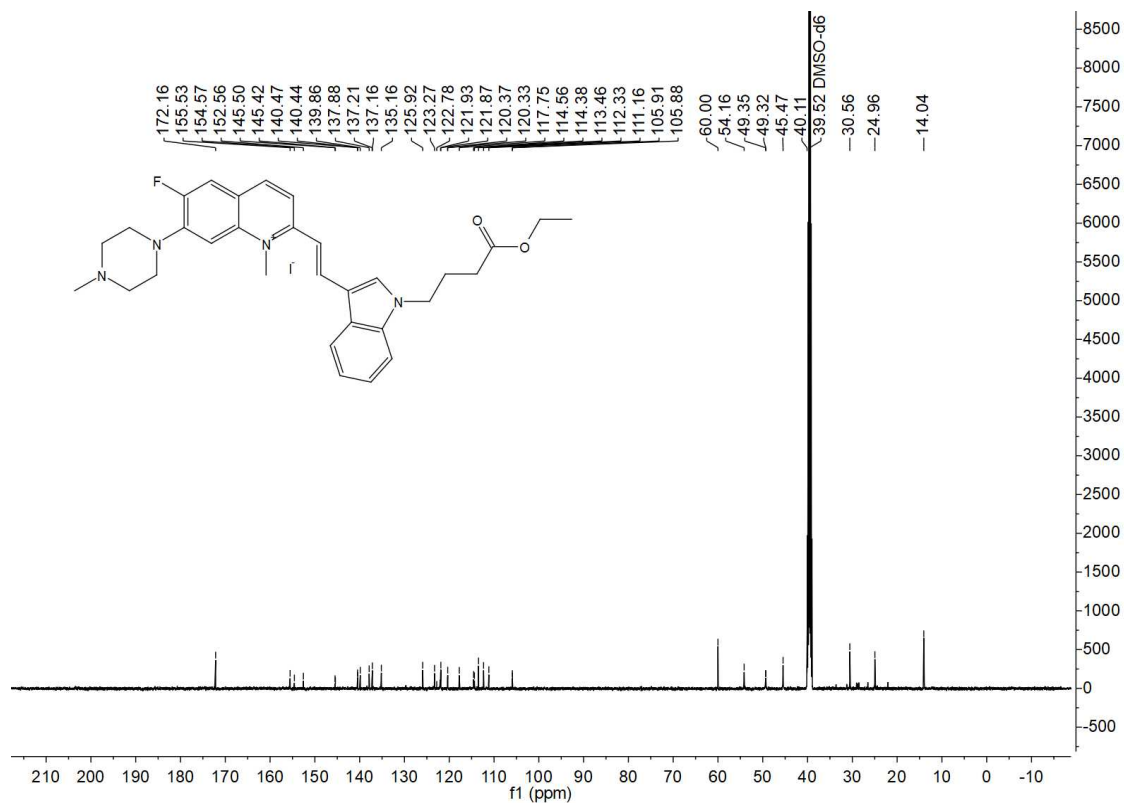

Figure S21. <sup>13</sup>C NMR spectrum of QUID-4.

Event#: 1 MS(E+) Ret. Time : 0.797 Scan#: 119

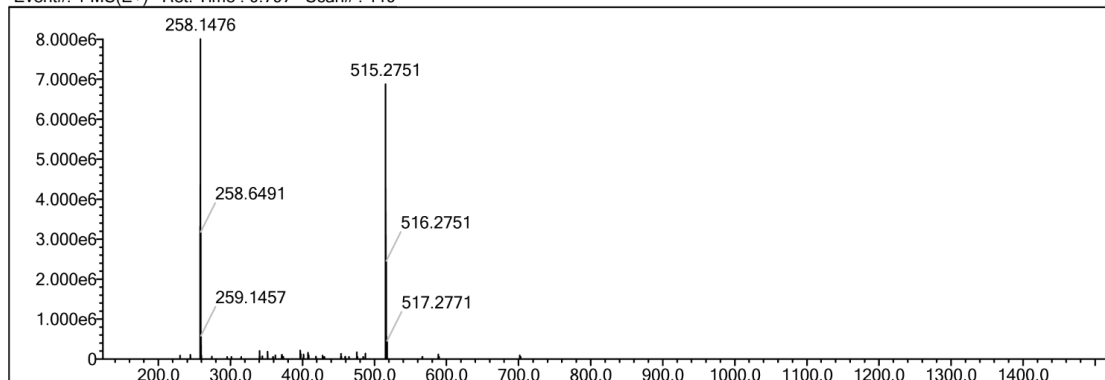

Measured region for 515.2751  $m/z$

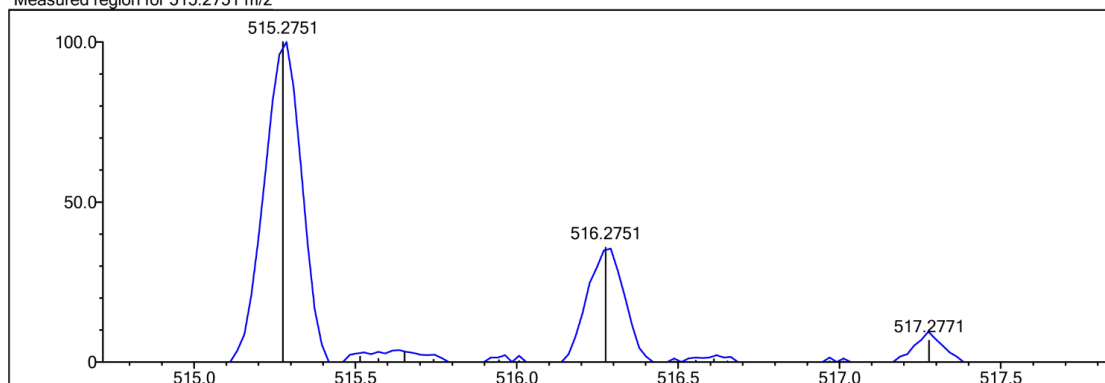

C31 H36 N4 O2 F M+ : Predicted region for 515.2817  $m/z$

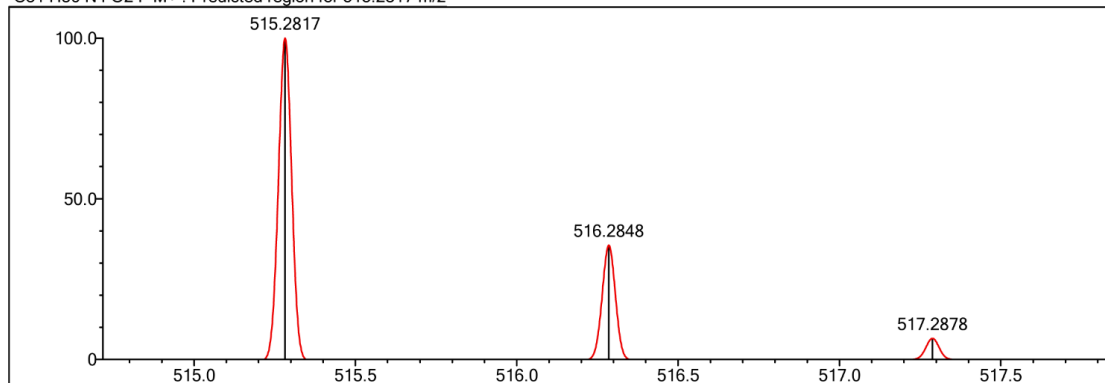

| Rank | Score | Formula (M)     | Ion | Meas. $m/z$ | Pred. $m/z$ | Df. (mDa) | Df. (ppm) | Iso   | DBE  |
|------|-------|-----------------|-----|-------------|-------------|-----------|-----------|-------|------|
| 2    | 24.79 | C31 H36 N4 O2 F | M+  | 515.2751    | 515.2817    | -6.6      | -12.81    | 76.26 | 15.5 |

**Figure S22.** HRMS spectrum of QUID-4.

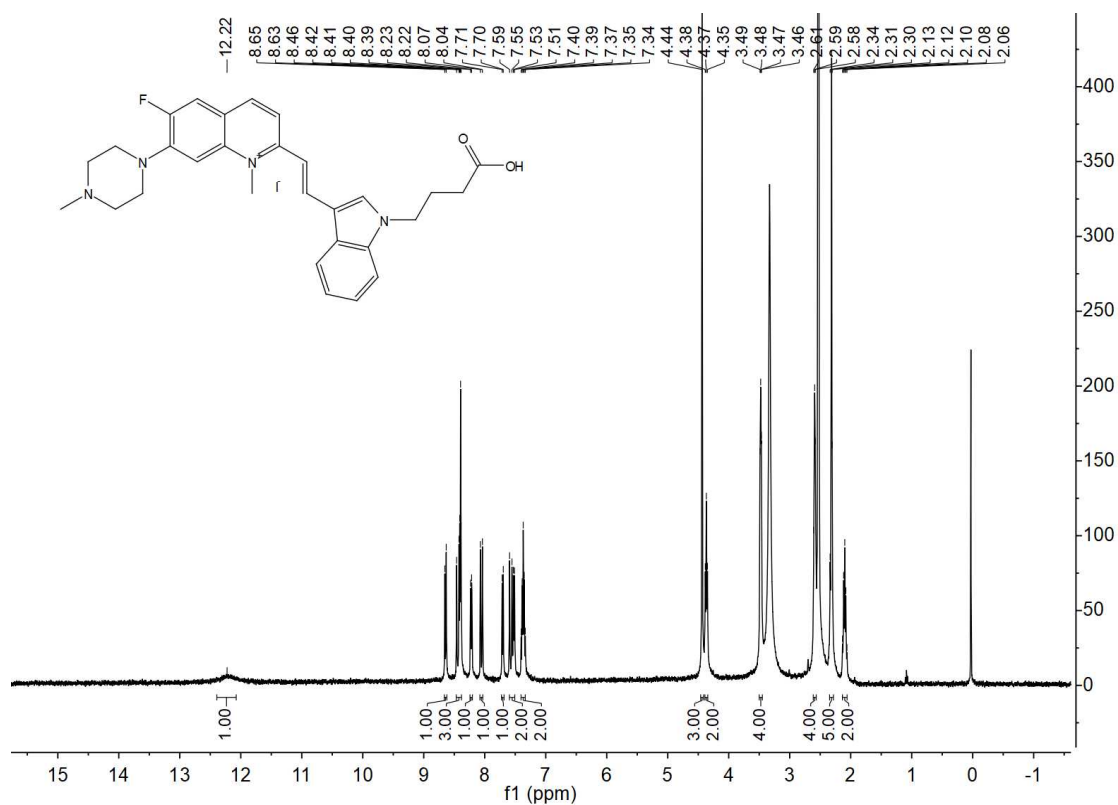

Figure S23. <sup>1</sup>H NMR spectrum of QUID-5.

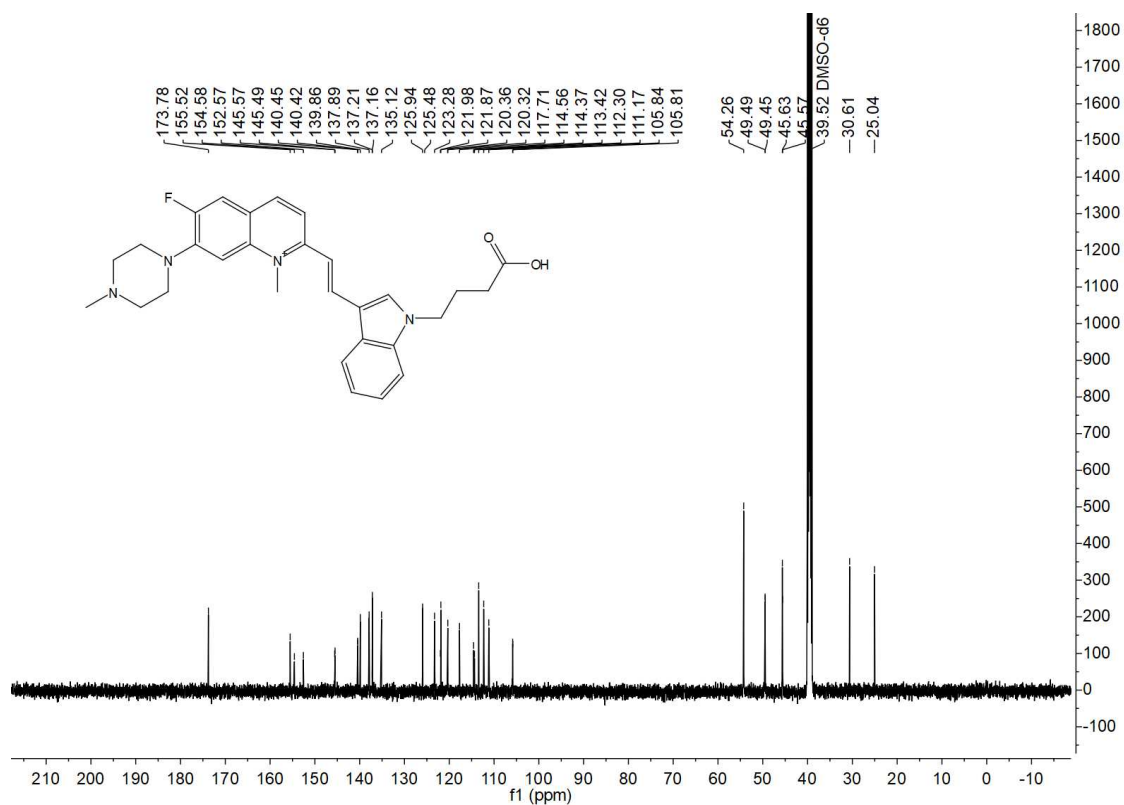

Figure S24. <sup>13</sup>C NMR spectrum of QUID-5.

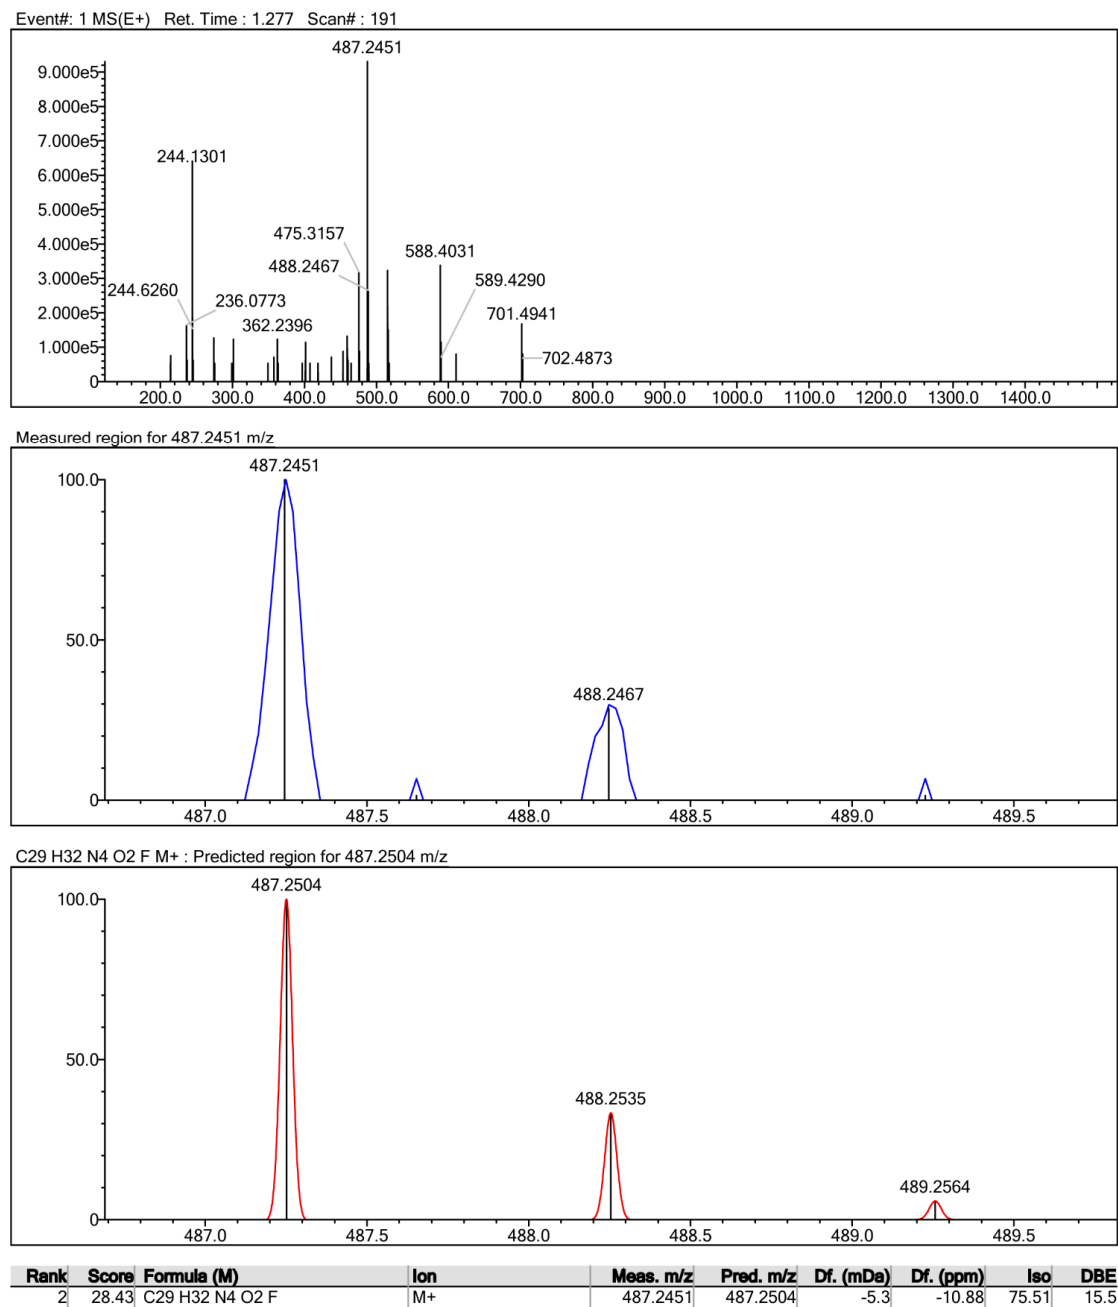

Figure S25. HRMS spectrum of QUID-5.

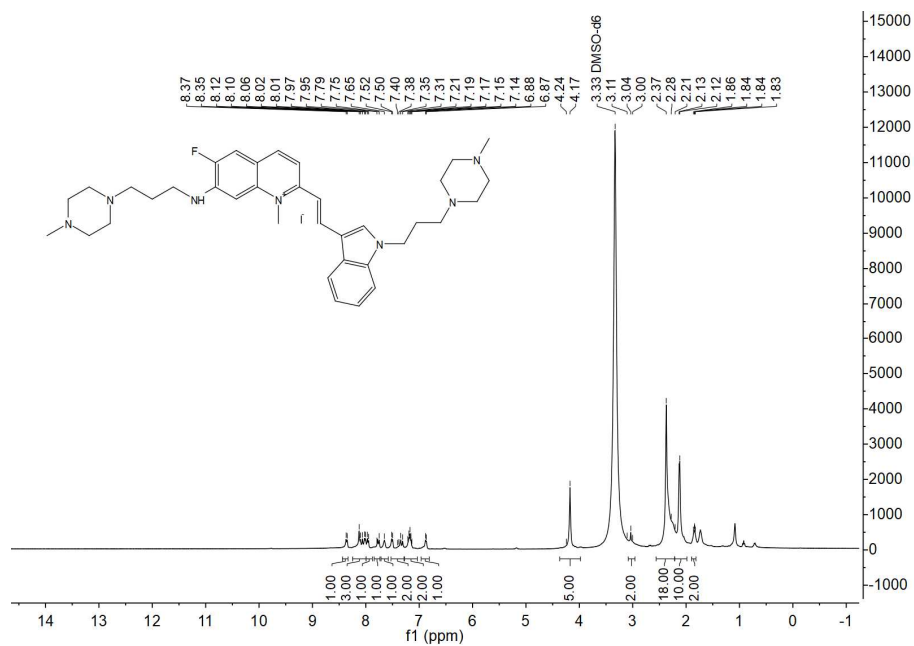

**Figure S26.** <sup>1</sup>H NMR spectrum of QUID-6.

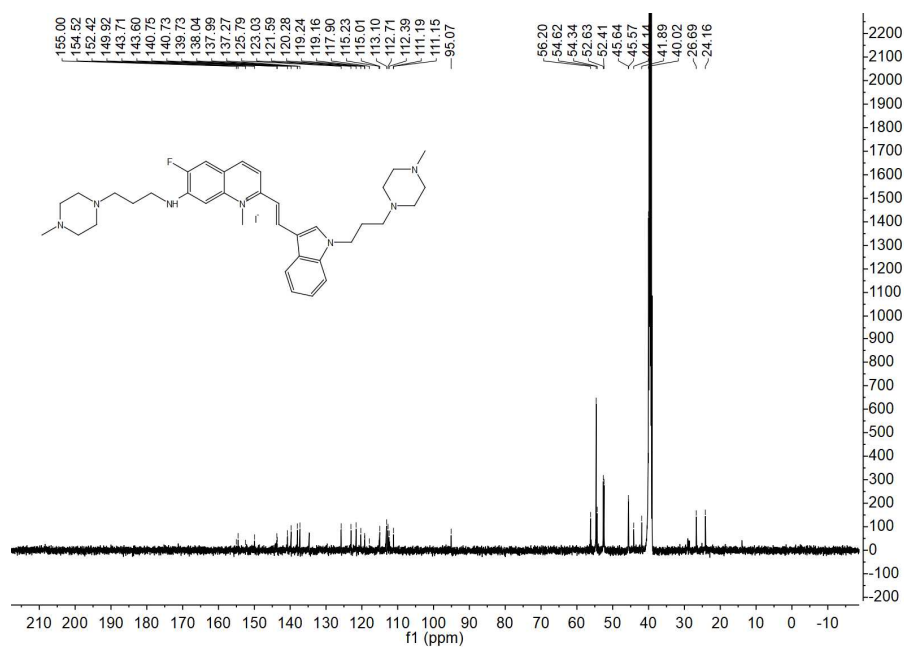

**Figure S27.** <sup>13</sup>C NMR spectrum of QUID-6.

Event#: 1 MS(E+) Ret. Time : 0.503 Scan#: 75

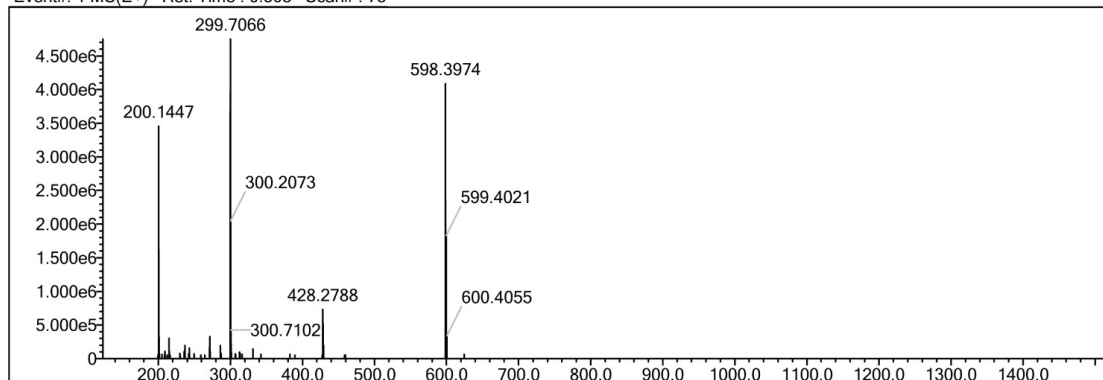

Measured region for 598.3974 m/z

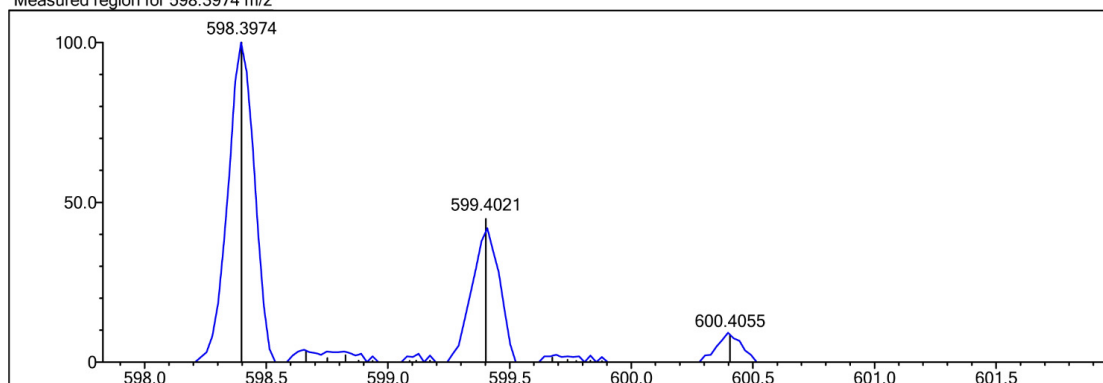

C36 H49 N7 F M+: Predicted region for 598.4028 m/z

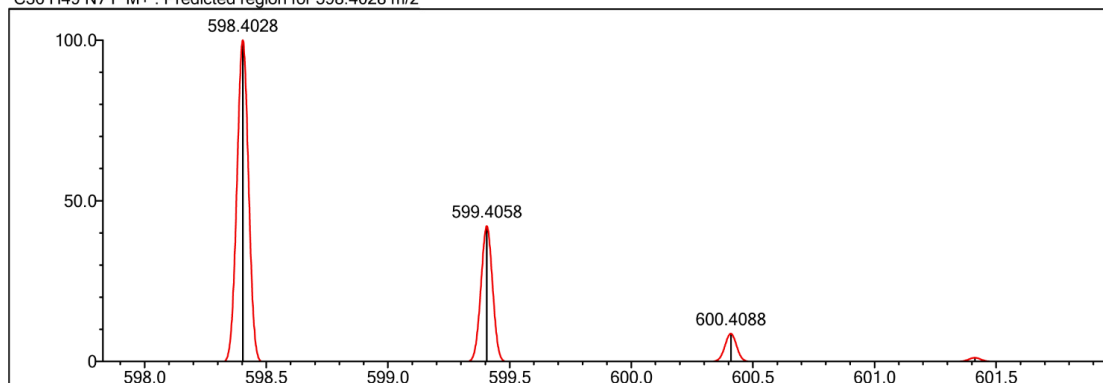

| Rank | Score | Formula (M)  | Ion | Meas. m/z | Pred. m/z | Df. (mDa) | Df. (ppm) | Iso   | DBE  |
|------|-------|--------------|-----|-----------|-----------|-----------|-----------|-------|------|
| 2    | 44.97 | C36 H49 N7 F | M+  | 598.3974  | 598.4028  | -5.4      | -9.02     | 90.29 | 15.5 |

Figure S28. HRMS spectrum of QUID-6.
